# Supplementary material for: Sex-specific impact of early nutrition on neurodevelopment, cognition and brain structure in healthy children up to 6-year-old: Findings from the COGNIS study
Source: Research Square preprint supplement (doi:10.21203/rs.3.rs-7067933/v1), 2025-07-18
Supplement: Supplementary file 2 [file c2bf325c46dd906b8d7d4e27.docx]

**Table 2. Infant neurodevelopment up to 18 months old depending on their sex1**

| **Bayley's III Composite Scores** | | **6 months3** | ***P2*** | ***Padj*** | **12 months4** | ***P2*** | ***Padj*** | **18 months5** | ***P2*** | ***Padj*** |
| --- | --- | --- | --- | --- | --- | --- | --- | --- | --- | --- |
| **Cognitive** | Boys | 118.92±11.86 | 0.088 | 0.191 | 134.10±11.97 | 0.574 | 0.874 | 126.45±13.24 | **0.019** | 0.065 |
|  | Girls | 121.71±8.55 |  |  | 135.14±10.71 |  |  | 131.38±11.09 |  |  |
| **Language** | Boys | 120.89±9.70 | 0.807 | 0.411 | 120.01±11.80 | 0.876 | 0.844 | 110.92±12.24 | 0.124 | **0.045** |
|  | Girls | 120.54±8.83 |  |  | 120.35±14.25 |  |  | 114.23±13.10 |  |  |
| **Motor skills** | Boys | 112.61±13.41 | 0.252 | 0.103 | 113.31±16.56 | 0.785 | 0.797 | 119.79±12.97 | 0.477 | 0.680 |
|  | Girls | 114.97±13.15 |  |  | 114.09±18.33 |  |  | 121.38±13.57 |  |  |
| **Social-emotional** | Boys | 100.86±16.08 | 0.238 | 0.113 | 101.27±16.04 | 0.421 | 0.230 | 101.18±18.53 | 0.536 | 0.052 |
|  | Girls | 103.88±16.98 |  |  | 103.31±14.80 |  |  | 103.20±19.97 |  |  |

1Data are presented as means of composite score ± SD.

2*P*-values for differences between groups. T-Test for normally distributed variables.

*Padj* are univariate analysis of covariance (ANCOVA) adjusted by maternal age, smoking during pregnancy, familiar socioeconomic status and COGNIS groups. Bonferroni post hoc test was performed. P-values < 0.05 are highlighted in bold.

3Infants at 6 months: Boys (n=93); Girls (n=76).

4Infants at 12 months: Boys (n=83); Girls (n=69).

5Infants at 18 months: Boys (n=76); Girls (n=65).
