# Supplementary material for: Sex-specific impact of early nutrition on neurodevelopment, cognition and brain structure in healthy children up to 6-year-old: Findings from the COGNIS study
Source: Research Square preprint supplement (doi:10.21203/rs.3.rs-7067933/v1), 2025-07-18
Supplement: Supplementary file 3 [file c351e393100dcfd1f66c1b8a.docx]

**Table 6. Children neurocognitive function at 4 years old according to sex and COGNIS groups1**

|  |  | **Boys (n=71)** | | | | |  | **Girls (n=51)** | | | | |
| --- | --- | --- | --- | --- | --- | --- | --- | --- | --- | --- | --- | --- |
|  | **SF (n=31)** | | **EF (n=27)** | **BF (n=13)** | ***p*2** | ***p*adj** | **SF (n=15)** | | **EF (n=16)** | **BF (n=20)** | ***p*2** | ***p*adj** |
| **Kaufman Brief Intelligence Test (K-BIT)** | | | | | | | | | | | | |
| Vocabulary (typical score) | 103.61±14.38 | | 106.07±14.32 | 105.54±13.84 | 0.795 | 0.540 | 102.40±16.46 | | 101.69±15.31 | 105.65±14.66 | 0.711 | 0.891 |
| Matrices (typical score) | 115.45±13.66a | | 117.59±13.47a,b | 128.15±10.29b | **0.015** | 0.200 | 118.80±8.99 | | 119.69±13.53 | 113.95±10.77 | 0.263 | 0.119 |
| IQ (typical score) | 108.52±13.82 | | 111.15±13.43 | 117.00±10.57 | 0.156 | 0.452 | 109.93±11.55 | | 109.88±12.16 | 108.95±12.57 | 0.963 | 0.688 |
| **Oral Language Test of Navarra-Revised (PLON-R)** | | | | | | | | | | | | |
| Form (typical score) | 54.19±19.15 | | 55.11±18.30 | 53.15±13.82 | 0.947 | 0.718 | 56.2±16.55 | | 58.81±14.56 | 63.45±15.13 | 0.373 | 0.592 |
| Content (typical score) | 41.00±17.44 | | 41.56±17.81 | 50.46±18.53 | 0.246 | 0.096 | 42.53±14.38 | | 45.00±18.93 | 52.05±12.80 | 0.180 | 0.564 |
| Use (typical score) | 45.52±12.02 | | 52.07±11.95 | 52.85±9.61 | 0.055 | 0.077 | 47.00±10.14 | | 51.50±10.00 | 49.45±11.09 | 0.495 | 0.596 |
| Total Score PLON-R (typical score) | 46.55±17.78 | | 50.15±17.81 | 54.38±15.55 | 0.383 | 0.107 | 48.13±15.47 | | 53.06±19.07 | 59.50±14.98 | 0.136 | 0.508 |
| **Computerized Battery for Neuropsychological**  **Evaluation of Children (BENCI)** | | | | | | | | | | | | |
| Verbal comprehension (successes) | 7.77±1.17 | | 7.81±0.92 | 7.38±0.65 | 0.415 | 0.935 | 7.79±0.70a,b | | 8.13±1.02a | 7.25±0.85b | **0.015** | 0.121 |
| Semantic fluency (successes) | 4.34±2.32 | | 4.81±1.90 | 4.08±2.53 | 0.562 | 0.335 | 4.43±2.24 | | 4.25±2.18 | 5.15±2.48 | 0.471 | 0.558 |
| Verbal short-term memory (successes) | 2.81±1.40 | | 2.49±1.21 | 2.56±1.23 | 0.637 | 0.782 | 2.76±1.25 | | 2.58±1.28 | 3.12±1.02 | 0.388 | 0.561 |
| Verbal long-term memory (successes) | 1.03±1.67 | | 0.78±1.40 | 1.08±1.75 | 0.786 | 0.621 | 1.43±1.99 | | 1.31±1.58 | 1.45±1.79 | 0.972 | 0.561 |
| Verbal long-term memory (recognition successes) | 7.00±1.70 | | 7.70±2.16 | 7.77±2.65 | 0.357 | 0.137 | 7.14±2.38 | | 7.88±1.82 | 8.00±2.29 | 0.504 | 0.337 |
| Visuomotor (mean seg) | 16.34±16.96 | | 14.71±14.89 | 14.83±9.89 | 0.909 | 0.808 | 11.96±9.64 | | 10.86±5.41 | 10.34±5.89 | 0.801 | 0.887 |
| Alternate visuomotor (mean seg) | 49.91±48.48 | | 38.42±26.93 | 39.53±21.35 | 0.466 | 0.331 | 36.89±21.47 | | 39.10±24.11 | 47.08±33.22 | 0.519 | 0.668 |

1Data are presented as means ± SD.

2*P*-values for differences between COGNIS-groups. ANOVA test for normally distributed variables.

*Padj* are univariate analysis of covariance (ANCOVA) adjusted by smoking during pregnancy, maternal age and familiar socioeconomic status. Values not sharing the same sufﬁx (ab) were signiﬁcantly different in the Bonferroni post hoc test. *P*-values < 0.05 are highlighted in bold.

SF: Standard infant formula; EF: Experimental infant formula; BF: Breastfed infants.
