# Supplementary material for: Sex-specific impact of early nutrition on neurodevelopment, cognition and brain structure in healthy children up to 6-year-old: Findings from the COGNIS study
Source: Research Square preprint supplement (doi:10.21203/rs.3.rs-7067933/v1), 2025-07-18
Supplement: Supplementary file 4 [file cb14aa6fa8f6633a49a0b109.docx]

**Table 3. Infant neurodevelopment up to 18 months old depending on their sex and type of feeding1**

| **Bayley's III Composite Scores** | | | **6 months3** | ***P2*** | ***Padj*** | **12 months4** | ***P2*** | ***Padj*** | | **18 months5** | ***P2*** | ***Padj*** |
| --- | --- | --- | --- | --- | --- | --- | --- | --- | --- | --- | --- | --- |
| **BOYS** | | | | | | | | | | | | |
| **Cognitive** | SF | | 118.06±14.46 | 0.843 | 0.976 | 132.67±15.30a,b | **<0.001** | **0.038** | | 126.43±13.67a,b | **0.003** | **0.026** |
|  | EF | | 119.64±10.14 |  |  | 132.37±9.85a |  |  | | 122.12±12.75a |  |  |
|  | BF | | 119.00±9.86 |  |  | 141.33±5.50b |  |  | | 136.00±8.06b |  |  |
| **Language** | SF | | 120.75±10.74 | 0.095 | 0.190 | 121.07±11.45 | 0.629 | 0.599 | | 112.75±13.63 | 0.370 | 0.739 |
|  | EF | | 122.64±8.41 |  |  | 120.18±12.84 |  |  | | 111.06±11.81 |  |  |
|  | BF | | 116.33±9.58 |  |  | 117.47±9.96 |  |  | | 107.20±10.19 |  |  |
| **Motor skills** | SF | | 114.25±16.65 | 0.476 | 0.726 | 117.27±19.88 | 0.164 | 0.243 | | 119.82±12.53a | **0.007** | **0.007** |
|  | EF | | 110.74±10.77 |  |  | 109.68±13.83 |  |  | | 115.85±13.45a |  |  |
|  | BF | | 113.93±11.37 |  |  | 114.60±14.56 |  |  | | 128.40±8.32b |  |  |
| **Social-emotional** | SF | | 102.08±16.01 | 0.751 | 0.769 | 101.00±13.73 | 0.262 | 0.839 | | 103.75±20.58 | 0.583 | 0.332 |
|  | EF | | 100.71±16.14 |  |  | 103.68±18.33 |  |  | | 98.79±18.46 |  |  |
|  | BF | | 98.33±16.87 |  |  | 95.67±13.35 |  |  | | 101.67±14.72 |  |  |
| **GIRLS** | | | | | | | | | | | | |
| **Cognitive** | SF | 122.50±8.97 | | 0.300 | 0.522 | 138.57±8.08 | 0.087 | 0.339 | 132.00±10.05 | | 0.507 | 0.375 |
|  | EF | 119.62±8.59 | |  |  | 136.00±9.13 |  |  | 129.13±13.45 | |  |  |
|  | BF | 123.08±8.01 | |  |  | 131.09±13.23 |  |  | 133.18±9.20 | |  |  |
| **Language** | SF | 121.42±10.51 | | 0.426 | 0.149 | 124.71±12.10a | **0.025** | 0.451 | 117.50±15.42 | | 0.409 | 0.472 |
|  | EF | 118.69±8.80 | |  |  | 122.56±14.40a,b |  |  | 113.04±11.21 | |  |  |
|  | BF | 121.58±7.02 | |  |  | 113.96±14.22b |  |  | 112.50±12.71 | |  |  |
| **Motor skills** | SF | 116.42±13.88 | | 0.151 | 0.978 | 119.10±20.89 | 0.176 | 0.437 | 123.15±11.11 | | 0.725 | 0.979 |
|  | EF | 110.96±13.11 | |  |  | 114.72±18.60 |  |  | 119.70±16.96 | |  |  |
|  | BF | 117.65±11.98 | |  |  | 108.83±14.53 |  |  | 121.55±11.92 | |  |  |
| **Social-emotional** | SF | 105.21±13.63 | | 0.309 | 0.986 | 104.52±13.12 | 0.893 | 0.072 | 106.00±20.88 | | 0.619 | 0.065 |
|  | EF | 99.81±22.02 | |  |  | 103.13±16.80 |  |  | 100.00±22.47 | |  |  |
|  | BF | 106.73±13.49 | |  |  | 102.39±14.61 |  |  | 103.86±16.69 | |  |  |

1Data are presented as means of composite score ± SD. SF: standard infant formula; EF: experimental infant formula; BF: breastfed infants.

2*P*-values for differences between COGNIS groups. ANOVA for normally distributed variables.

*Padj* are univariate analysis of covariance (ANCOVA) adjusted by maternal age, smoking during pregnancy and familiar socioeconomic status. Values which do not share the same suffix (ab) are significantly different in a Bonferroni post-hoc test. P-values < 0.05 are highlighted in bold.

**BOYS:** 3Infants at 6 months: SF (n=36); EF (n=42); BF (n=15); 4Infants at 12 months: SF (n=30); EF (n=38); BF (n=15); 5Infants at 18 months: SF (n=28); EF (n=33); BF (n=15).

**GIRLS:** 3Infants at 6 months: SF (n=24); EF (n=26); BF (n=26); 4Infants at 12 months: SF (n=21); EF (n=25); BF (n=23); 5Infants at 18 months: SF (n=20); EF (n=23); BF (n=22).
